# Supplementary material for: Helenus and Ajax, Two Groups of Non-Autonomous LTR Retrotransposons, Represent a New Type of Small RNA Gene-Derived Mobile Elements
Source: MDPI journal article supplement (doi:10.3390/biology13020119), 2024-02-13
Supplement: s1 [file s1]

(A) tRNA-Thr-GGT (bivalves)

(B) tRNA-Thr-AGT/TGT (bivalves)

(C) tRNA-His-ATG (bivalves)

(D) tRNA-Thr-TGT (fungi)

(E) tRNA-Thr-AGT (fungi)

(F) tRNA-Thr-CGT (fungi)

[illegible]
