# Supplementary material for: Helenus and Ajax, Two Groups of Non-Autonomous LTR Retrotransposons, Represent a New Type of Small RNA Gene-Derived Mobile Elements
Source: MDPI journal article supplement (doi:10.3390/biology13020119), 2024-02-13
Supplement: s1 [file s1]

**Figure S3. Primer-binding sites (PBSs) of *Ajax* families.** The tRNA sequence is shown in red in the reverse orientation. The PBS nucleotides complementary to the tRNA are highlighted in yellow. tRNA sequences are from *Homo sapiens*.

|               |                                               |
|---------------|-----------------------------------------------|
| tRNA-Leu-AAG  | 3'-ACCGUCGCCACCCUAAG-5' ( <i>H. sapiens</i> ) |
| Ajax-1_NGe-I  | TC <b>TGGCAG</b> ACCTTCCCAGTC                 |
| Ajax-1_LiLo-I | TC <b>TGGCAG</b> ACCTTCCCACGC                 |
