# Supplementary material for: Helenus and Ajax, Two Groups of Non-Autonomous LTR Retrotransposons, Represent a New Type of Small RNA Gene-Derived Mobile Elements
Source: MDPI journal article supplement (doi:10.3390/biology13020119), 2024-02-13
Supplement: s1 [file s1]

**Figure S2. Primer-binding sites (PBSs) of *Helenus* families.** The tRNA sequence is shown in red in the reverse orientation. The enzymatically added 3' terminal CCA is shown in lowercases. The PBS nucleotides complementary to the tRNA are highlighted in yellow. **(A)** *Helenus* from hymenopteran insects. **(B)** *Helenus* from vertebrates. **(C)** *Helenus* from bivalves. tRNA sequences are from *Apis mellifera* for hymenopteran insects, *Homo sapiens* for vertebrates, and *Aplysia californica* for bivalves.

**(A)**

|                     |                                                         |
|---------------------|---------------------------------------------------------|
| <b>tRNA-Lys-CTT</b> | <b>3'-accGCGGGUUGCACCCCGAG-5' (<i>A. mellifera</i>)</b> |
| BEL-4 NVi-I.        | TTT <b>TGGCGCC</b> GAACAGGGACCT                         |
| Gypsy-16-I NVi      | T <b>TGGCGCC</b> ACTTCGTGGGT                            |
| Helenus-1_MeDo-I    | <b>TGGCGCCCA</b> CTAAACGACC                             |
| Helenus-1_PhiTri-I  | <b>TGGCGCCCA</b> CTAATAAATC                             |
| Helenus-2_EuAn-I    | AC <b>TGGCGCCCA</b> CTAAATAACC                          |
| Helenus-4_MusRap-I  | <b>TGGCGCCCA</b> CTGAAATACC                             |
| Helenus-1_MusRap-I  | <b>TGGCGCCCA</b> CTGAATAACC                             |
| ULTR-1-I NVi        | <b>TGGCGCCCA</b> CTGAATTACC                             |
| Helenus-2_PhiTri-I  | AA <b>TGGCGCCCA</b> CTCAATAACC                          |
| Helenus-2_NVit-I    | <b>TGGCGCCCA</b> CTCAAAAACC                             |
| Helenus-3_PtePup-I  | <b>TGGCGCCCA</b> CTCAAAAACC                             |
| Helenus-3_TheEle-I  | AA <b>TGGCGCCCA</b> CTCAAAAACC                          |
| Helenus-2_EuAd-I    | T <b>TGGCGCCCA</b> CTAAAAAACC                           |
| Helenus-1_EuAd-I    | TT <b>TGGCGCTCA</b> CTAAAAAACC                          |
| Helenus-2_PtePup-I  | <b>TGGCGCTCA</b> CTGAATTACC                             |
| Helenus-1_TrSa-I    | <b>TGGC-CCCA</b> CTGAATTACC                             |
| <b>tRNA-Leu-AAG</b> | <b>3'-accACCGUGCCACCCU-5' (<i>A. mellifera</i>)</b>     |
| Gypsy-130_CGi-I     | TAAATT <b>TGGTGGCAG</b> CGAGCGGT                        |
| Gypsy-57_CaAu-I     | TT <b>TGGTGGCAG</b> CGGT <b>GGGA</b>                    |
| Helenus-2_TheEle-I  | AAG <b>TGGTGGCAG</b> CTAATGGG                           |
| <b>tRNA-Leu-CAG</b> | <b>3'-accACAGUCUUCACCCU-5' (<i>A. mellifera</i>)</b>    |
| Gypsy-28-I NVi      | TTT <b>TGGTGTCA</b> GAAT <b>TGG</b> TT                  |
| Helenus-3_EuAn-I    | TT <b>TGGTGTCA</b> GAAGCAGGA                            |
| <b>tRNA-Trp-CCA</b> | <b>3'-accACUGGGGUGCACUAA-5' (<i>A. mellifera</i>)</b>   |
| Gypsy-32-I NVi      | T <b>TGGTGACCCG</b> AC <b>GTGAT</b> T                   |
| Helenus-2_SyJa-I    | <b>TGGTGACCCG</b> ACACTGCT                              |
| <b>tRNA-Arg-TCT</b> | <b>3'-accGUAGGGAACGCCCUA-5' (<i>A. mellifera</i>)</b>   |
| Gypsy-31 NVi-I      | TC <b>TGGCATCC</b> CT <b>AC</b> GTGGGG                  |
| Helenus-1_TheEle-I  | GATGGCATCCCT <b>TG</b> TGTGTC                           |
| Helenus-2_MusRap-I  | TTCTGGCATCCCT <b>TG</b> TGGGGA                          |
| Helenus-2_GasPul-I  | AAG <b>TGGCATCTCT</b> TGTGGGGA                          |
| Helenus-1_GasPul-I  | TTCTGGCAT <b>MCCT</b> TGTGAGG                           |
| Helenus-4_NVit-I    | CT <b>TGGCATCC</b> CTTGTGCGG                            |
| Helenus-1_PtePup-I  | CT <b>TGGCATCC</b> CTTGTGCGG                            |
| Helenus-3_NVit-I    | TTCTGGCATCCCT <b>TA</b> CGGGGG                          |
| Helenus-1_CeFu-I    | CT <b>TGGCATCC</b> CTGATGGGGA                           |
| Helenus-2_TrSa-I    | TTCTGGCATCCCT <b>GT</b> TGCGGA                          |
| Helenus-3_PhiTri-I  | TTCTGGCATCCCT <b>GT</b> TACGGG                          |

**(B)**

|                     |                                                           |
|---------------------|-----------------------------------------------------------|
| <b>tRNA-His-GTG</b> | <b>3'-accACGGCACUGAGCCUAA-5' (<i>H. sapiens</i>)</b>      |
| Helenus-1_TrDa-I    | TT <b>TGTGCCGTGAC</b> CCGGAT <b>T</b>                     |
| Helenus-1_ChCh-I    | TACAT <b>TGGTGCCGTGAC</b> CCGGATG                         |
| LTR-11_DR-I         | <b>TGGTGCCGTGAC</b> CCGGATG                               |
| <b>tRNA-Leu-CAA</b> | <b>3'-accACAGUCUUCACCCUAAAGCUU-5' (<i>H. sapiens</i>)</b> |
| Helenus-1_AcRu-I    | <b>TGGTGTCA</b> GAAGTGGGAT <b>G</b>                       |
| Helenus-1_PolSpa-I  | <b>TGGTGT</b> SAGAAGTGGGAC <b>G</b>                       |
| <b>tRNA-Lys-CTT</b> | <b>3'-accGCGGGUUGCAUCCCGAGUUU-5' (<i>H. sapiens</i>)</b>  |
| LTR1_LCh            | ATGGCGCCCA <b>CT</b> CGATGGCTT                            |
| LTR2_LCh            | ATGGCGCCCA <b>CT</b> CGATGGCTT                            |

## (C)

|                     |                                                      |
|---------------------|------------------------------------------------------|
| <b>tRNA-Lys-CTT</b> | <b>3'-accGCGGGUUGCUCCCG-5' (A. californica)</b>      |
| Gypsy-125_CGi-I     | AATGGCGGCCAACGTGATTG                                 |
| Helenus-3_CGi-I     | TTTGGCGCCCAACGTACAAA                                 |
| Helenus-4_SaGl-I    | TTTGGCGCCCAACGTACAAA                                 |
| Helenus-3_CVi-I     | TTTGGCGCCCAACGTAGATA                                 |
| Helenus-1_PiIm-I    | ATGGCGCCCAACGTAAATC                                  |
| Helenus-4B_SaGl-I   | TTTGGCGCCCAACGAAAATA                                 |
| Helenus-1_PiNo-I    | AATGGCGCCCA-CGTTGGGA                                 |
| Helenus-1_MiYe-I    | TTGGCGCCCA-CGTAGGGA                                  |
| Helenus-3_MiYe-I    | TTGGCGCCCA-CGTAGGGA                                  |
| Helenus-1_CGi-I     | TTTGGCGCCCA-CGTTGGGA                                 |
| Helenus-3_SaGl-I    | TTTGGCGCCCA-CGTTGGGA                                 |
| Helenus-2_ArIr-I    | TTGGCGCCCA-TGTAGGGA                                  |
| Helenus-1_PeMa-I    | TTGGCGCCCA-TGTAGGGA                                  |
| Helenus-2_CVi-I     | TTTGGCGCCCA-TGTTGGGA                                 |
| Helenus-1_LimFor-I  | TTTGGCGCCCACTGAAAAA                                  |
| Helenus-3_MyGa-I    | TTTGGCGCCCACTAAAAAC                                  |
| Helenus-6_SaGl-I    | TTGGCGCCCACTAAAAAA                                   |
| Helenus-1_MyCo-I    | TTGGCGCCCACTAAAAAA                                   |
| Helenus-2_PeMa-I    | AAATGGCGCCCACTAAAAATA                                |
| Helenus-5_PiIm-I    | GAATTGGCGCCCACTAAATGA                                |
| Helenus-3_ArIr-I    | TTGGCGCCCACTAAATAA                                   |
| Helenus-1_BaPl-I    | TTGGCGCCCACTAAATAA                                   |
| Helenus-1_ArIr-I    | GAATGGCGCCCACTAAATAA                                 |
| Helenus-1_MyGa-I    | TTGGCGCCCACTAAATAA                                   |
| Helenus-1_MoPh-I    | TTTGGCGCCCACTAAAAAAC                                 |
| Helenus-1B_MoPh-I   | TTTGGCGCCCACTAAAAAAC                                 |
| <b>tRNA-His-GTG</b> | <b>3'-accACGGCA-CUGGUCCUAAGC-5' (A. californica)</b> |
| Gypsy-39_CGi-I.     | TTATTGGTGCCGT-GACCAGGA                               |
| Helenus-3_PeMa-I    | TTGGTGCCCGACCACTC                                    |
| Helenus-4_ArIr-I    | TTGGTGCCGTAGACCACTC                                  |
| Helenus-2_SaGl-I    | -----GATTGGTGCCGTTGACCACTC                           |
| Helenus-4_PeMa-I    | -----GATTGGTGCCGTTGACCACTC                           |
| Helenus-5_PeMa-I    | TTTGGTGCCGTTGACCACTC                                 |
| Helenus-2C_CGi-I    | TTTGGTGCCGT-GACCAACC                                 |
| Helenus-1_SaGl-I    | TTTGGTGCCGT-G-CCATGC                                 |
| Helenus-4_MiYe-I    | -----AATTGGTGCCGTTGACCTC                             |
| Helenus-2_CGi-I     | TTTGGTGCCGT-GACCTGCC                                 |
| Helenus-1_CVi-I     | TTTGGTGCCGT-GACCTGCC                                 |
| Helenus-2B_CGi-I    | GATGGTGCCGT-GGCTTCC                                  |
| Helenus-2_PiIm-I    | TTTGGTGCCGT-GAGAGTGA                                 |
| <b>tRNA-His-GTC</b> | <b>3'-accAC-GGCACUGGUCCUA-5' (A. californica)</b>    |
| Gypsy-39_CGi-I      | TTATTGGTG-CCGTGACCAGGAT                              |
| Helenus-4_PiIm-I    | GTACAGTATTGGTG-CCGTGAGAGTGAA                         |
| Helenus-4_CVi-I     | -----TTTGGTG-CCATGGGCTTCCC                           |
| Helenus-2_MiYe-I    | -----TGGGTTCGTGGGCTCCC                               |
| <b>tRNA-Ile-AAT</b> | <b>3'-accACCGGUCAUACCCCC-5' (A. californica)</b>     |
| Gypsy-167_CGi-I     | TTTGGTGCCAGTGTGGGGG                                  |
| Helenus-5_SaGl-I    | -----TTTGGTGCCAGTGTGGGGG                             |
| Helenus-2_TeGr-I    | -----GTTGGTGCCAGTGTGGCCC                             |
| <b>tRNA-Pro-AGG</b> | <b>3'-accCCCGAGCAGGCCCUA-5' (A. californica)</b>     |
| Gypsy-13_CGi-I      | --TAAATATTGGGGGCTCGCTCCGAGG                          |
| Helenus-1_TeGr-I    | -----TTGGGGCTCGTCCAACCC                              |
| <b>tRNA-Glu-NNN</b> | <b>3'-accGCAGCGAUGGGCCUAA-5' (A. californica)</b>    |
| Helenus-2_PiNo-I    | -----CTGGCGTCGC CGTAAATGG                            |
| Helenus-3_PiNo-I    | -----ATGGCGTCGC CGGAAACCG                            |
| <b>tRNA-Ser-TGA</b> | <b>3'-accGCGACGCGCGUCCUAA-5' (A. californica)</b>    |
| Helenus-2_LimFor-I  | -----TTGGCGCTGC GAGCAACAAC                           |
| Helenus-2_MyGa-I    | -----TTGGCGCTGC GAGCAATTAC                           |
| Helenus-2_MoPh-I    | -----TTGGCGCTGC GAGCACTTAC                           |
| <b>tRNA-Ser-GCT</b> | <b>3'-accGCUGUCCUACCCCUAA-5' (A. californica)</b>    |
| Helenus-3_PiIm-I    | -----TTGGCGACGAGGTGAACAAT                            |
| Helenus-6_PiIm-I    | -----CTGGCGACGAGGTGAACAAT                            |
